# Supplementary material
Source: HighWire-hosted journal article supplement (https://ard.bmj.com/content/78/12/1621)

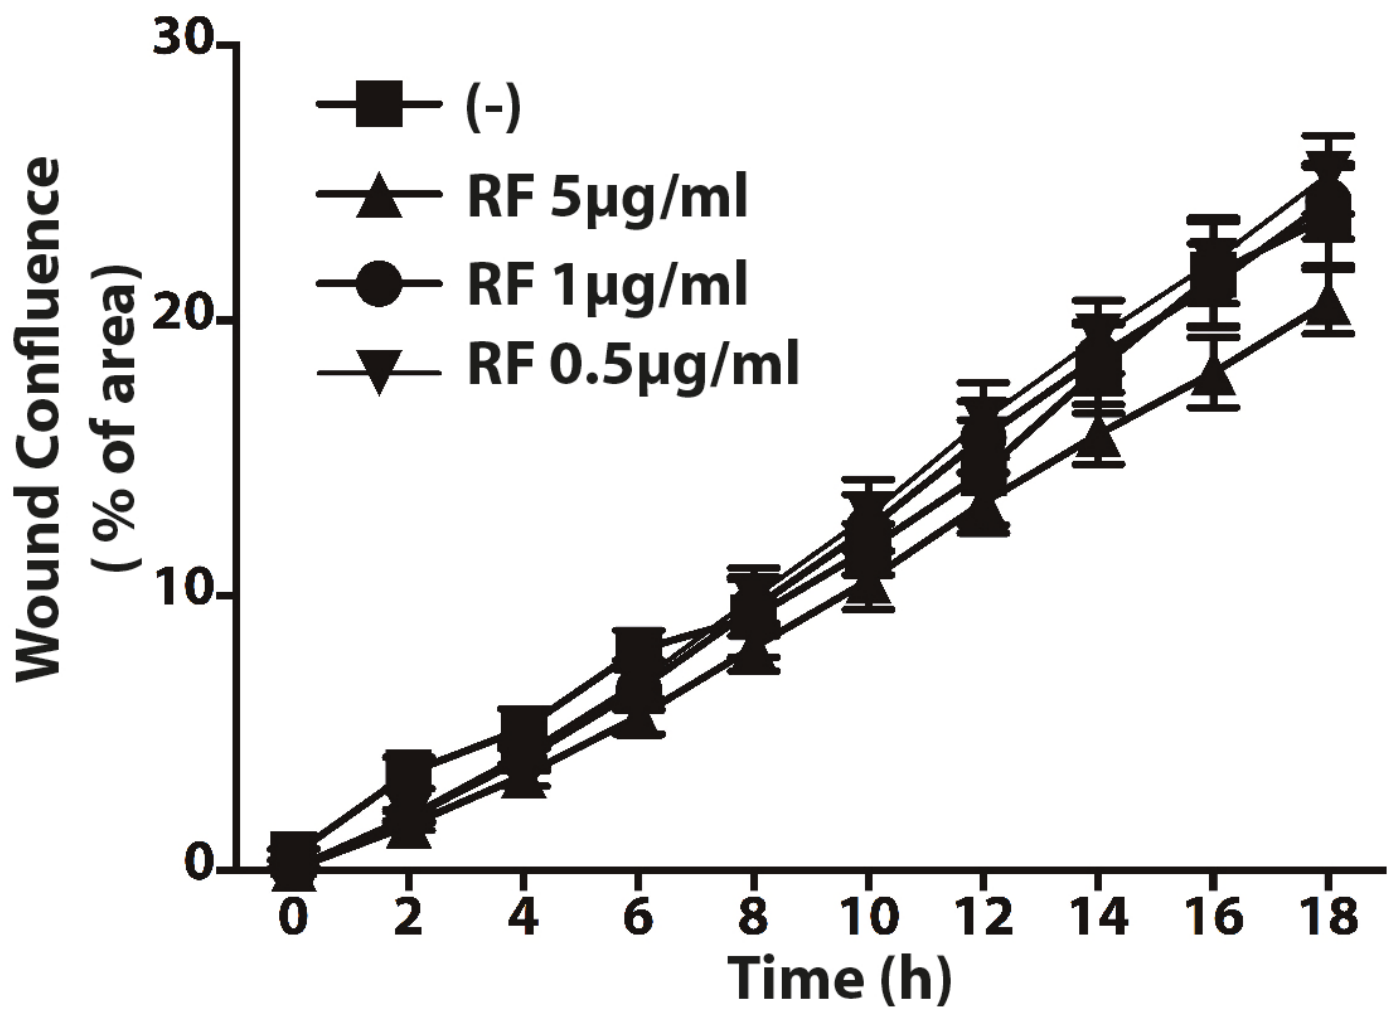

Supplement: inline-supplementary-material-4 [file inline-supplementary-material-4.pdf]
