# Supplementary material
Source: HighWire-hosted journal article supplement (https://ard.bmj.com/content/78/12/1621)

A

| Sample type   | Protein ID | Protein Name                                           | Peptide sequense                | Score |
|---------------|------------|--------------------------------------------------------|---------------------------------|-------|
| Non-ststarved | Q14517     | Protocadherin Fat 1                                    | R.LSFVTPC <b>it</b> HHR.A       | 30,2  |
| Starved       | Q14517     | Protocadherin Fat 1                                    | R.LSFVTPC <b>it</b> HHR.A       | 31    |
| Starved       | O75604     | Ubiquitin carboxyl-terminal hydrolase 2                | R.NLGC <b>it</b> SPMLARTR.K     | 39,7  |
| Starved       | Q9NZ71     | Regulator of telomere elongation helicase 1            | R.VCPYYLSC <b>it</b> NLK.Q      | 20,4  |
| Starved       | Q5SRE5     | Nucleoporin NUP188 homolog                             | R.LQSKIEDMC <b>it</b> IK.V      | 22    |
| Starved       | Q13011     | Delta(3,5)-Delta(2,4)-dienoyl-CoA isomerase            | MAAGIVASC <b>it</b> RLR.D       | 20,9  |
| Starved       | P57078     | Receptor-interacting serine/threonine-protein kinase 4 | K.SC <b>it</b> LFDTK.H          | 34,1  |
| Starved       | Q6ZVT0     | Inactive polyglycyclase TLL10                          | R.VVQC <b>it</b> YIQNPLLVDGRK.F | 20,8  |
| Starved       | O15020     | Spectrin beta chain, non-erythrocytic 2                | K.RLEDALC <b>it</b> AQQFYR.D    | 29,5  |

B

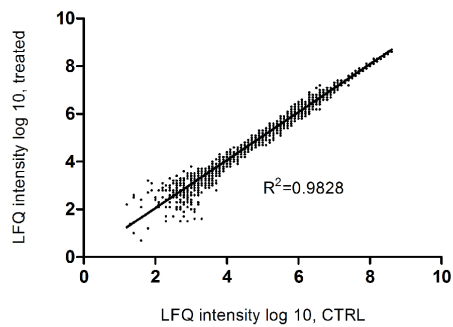

Supplement: inline-supplementary-material-7 [file inline-supplementary-material-7.pdf]
